# Supplementary material for: Herbivory and misidentification of target habitat constrain region-wide restoration success of spekboom (Portulacaria afra) in South African subtropical succulent thicket
Source: PeerJ journal article supplement (doi:10.7717/peerj.11944), 2021-08-11
Supplement: Figs1.PDF [file Figs1.PDF]

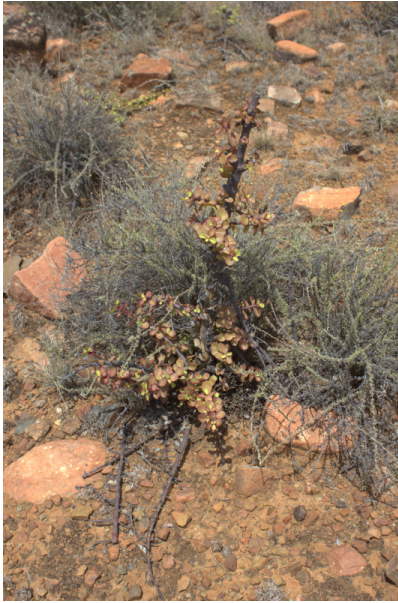

(a) Frost exposure: red discoloration of leaves

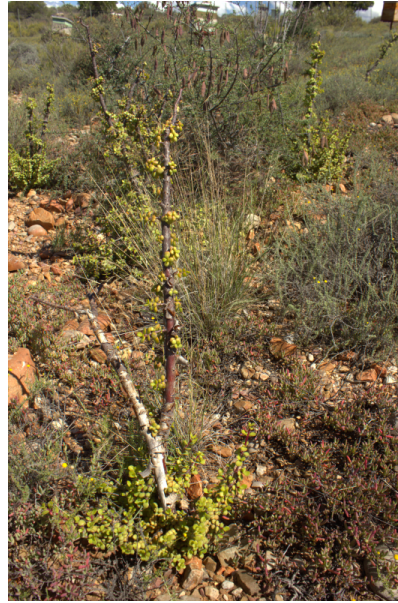

(b) Frost exposure: cracked and flaked stem with small leaves

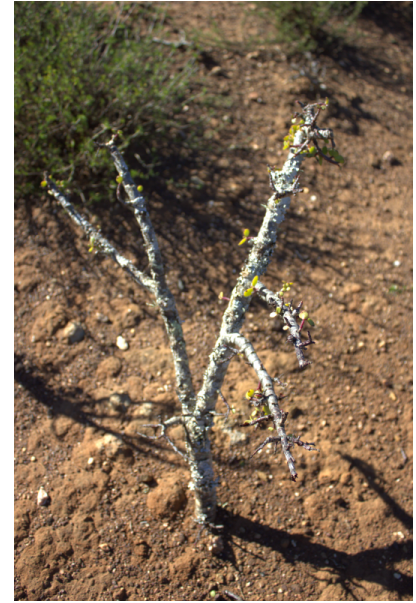

(c) Frost exposure: cracked and lichen-covered stem with few leaves

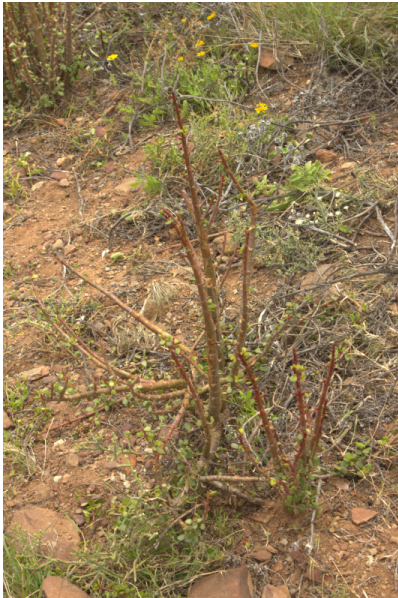

(d) Browse exposure: leaves stripped off healthy stems

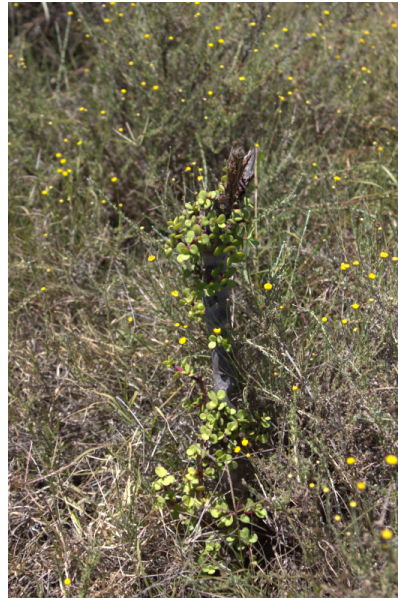

(e) Browsing induced damage. Notice healthy leaves still emerging

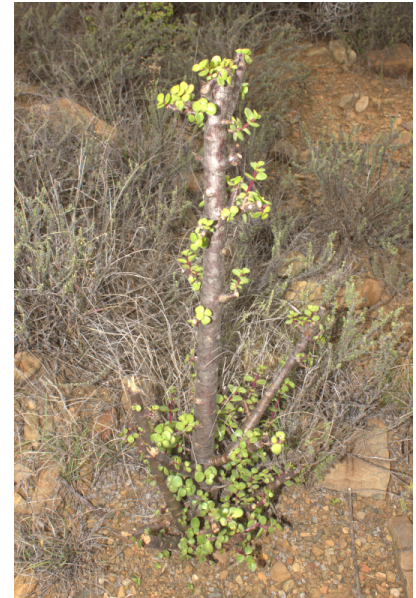

(f) Browsing induced damage: top of main stem and side shoots missing

Figure S1: Photographs of truncheons exposed to frost (a, b, c) and to browsing (d, e, f) illustrating signs of the cause of impact on observed truncheons.
